# Supplementary material
Source: PubMed Central journal article supplement (PMC5539988)

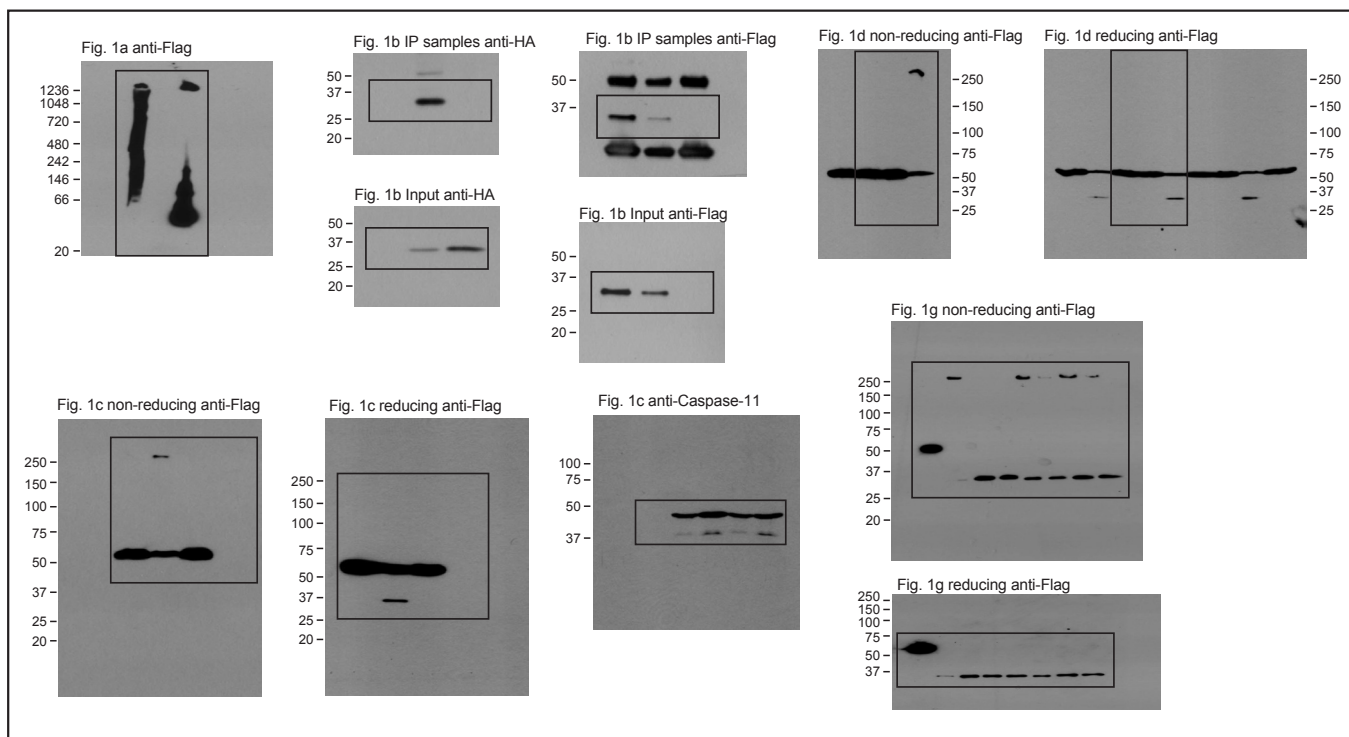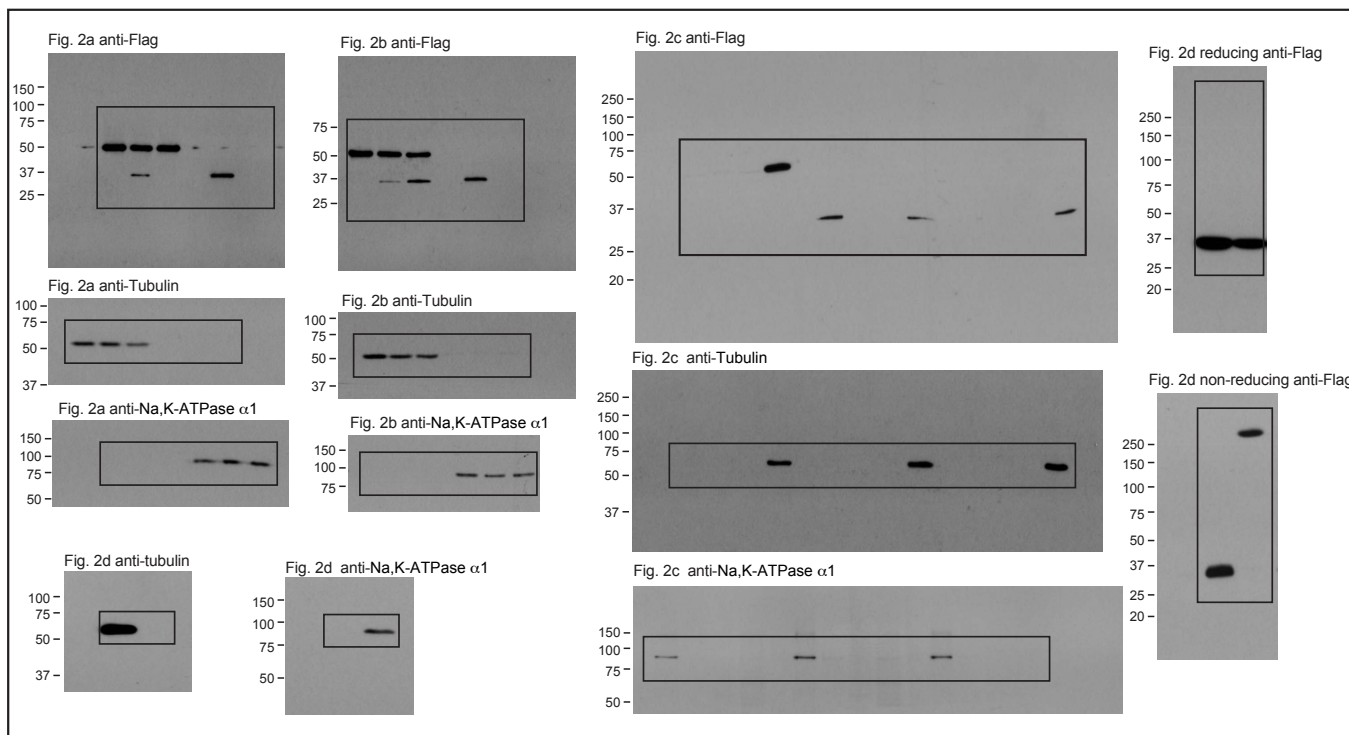

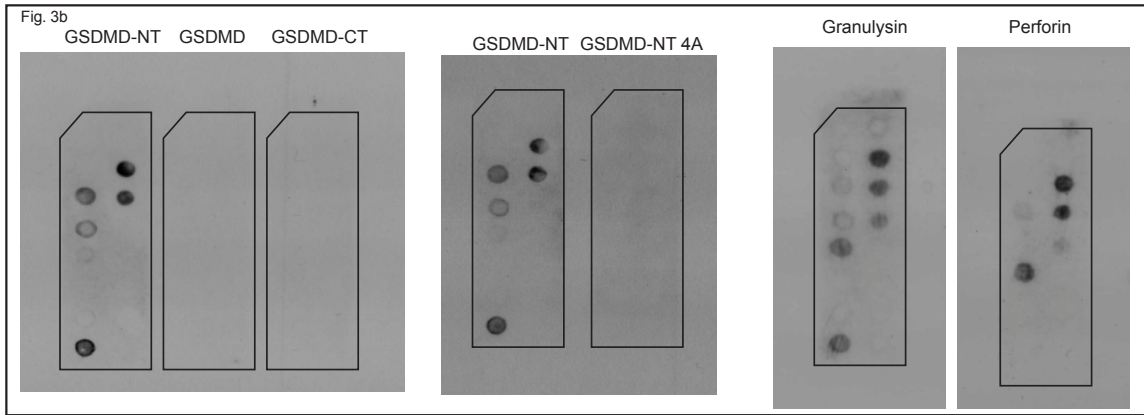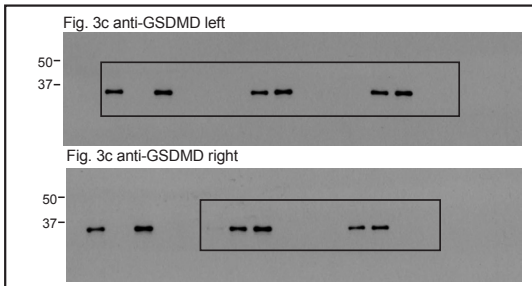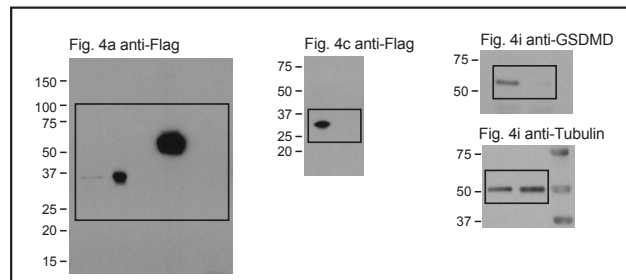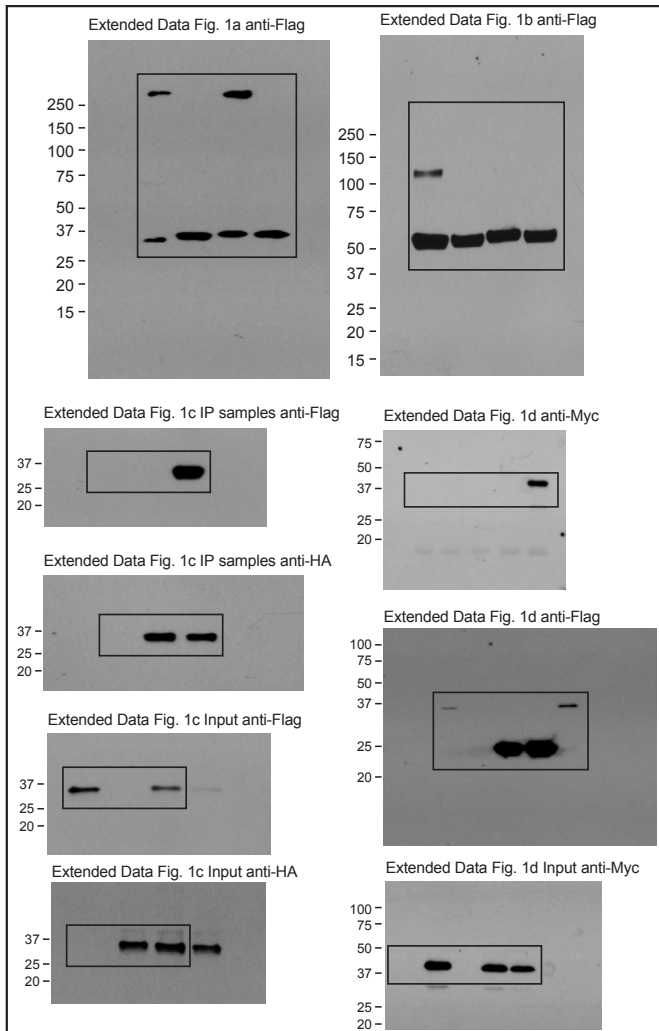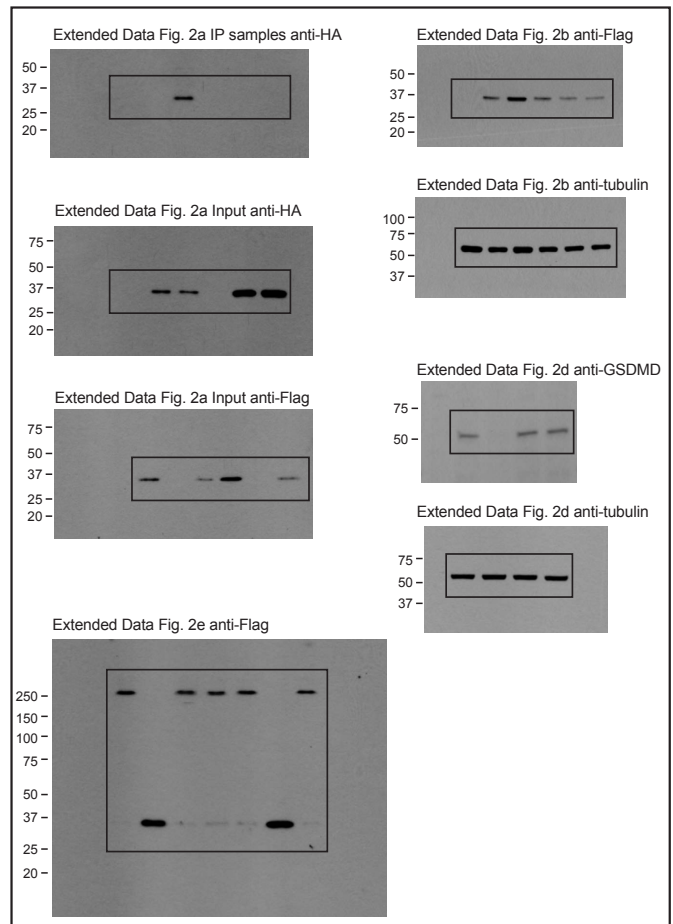

Supplement: NIHMS884373-supplement-supplement_1.pdf [file NIHMS884373-supplement-supplement_1.pdf]
